# Supplementary material
Source: PubMed Central journal article supplement (PMC3192976)
Supplement: mmc1.pdf [file mmc1.pdf]

# Monte Carlo simulation of protein-induced lipid demixing in a membrane with interactions derived from experiment

Paulo F. Almeida\*

Department of Chemistry and Biochemistry  
University of North Carolina Wilmington

Alexis Best

Department of Chemistry and Biochemistry  
University of North Carolina Wilmington

Anne Hinderliter

Department of Chemistry and Biochemistry  
University of Minnesota Duluth

**SUPPORTING MATERIAL**

## Monte Carlo simulations of larger lattices

Results of simulations in  $200 \times 200$  lattices are shown below. Identical results were obtained in  $300 \times 300$  lattices (not shown). In the presence of protein–protein interactions, the domain size in scales with the system size. In the  $200 \times 200$  lattice the solution volume was  $4 \times 10^7$  L/ $N_A$  (Avogadro’s number), and the total number of proteins in the system was  $4 \times 10^4$ , thus yielding a lipid and protein concentrations of 1 mM and  $100 \mu\text{M}$ , the same as used in the  $100 \times 100$  lattice simulations in the main paper. Similarly the volume and number of proteins were scaled by a factor of 9 in the  $300 \times 300$  lattice simulations.

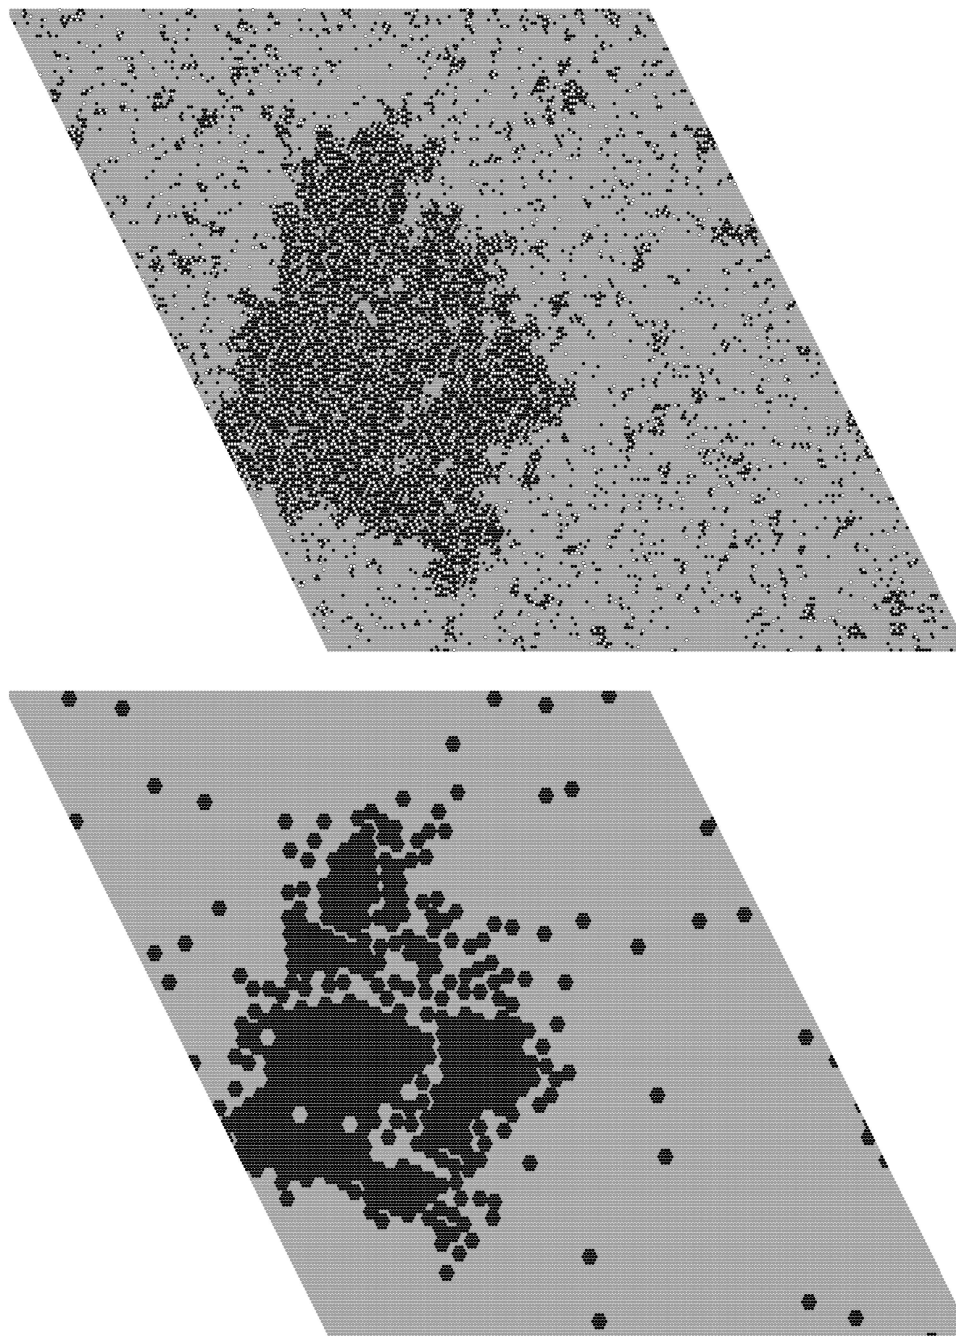

Figure S1 Snapshot of a  $200 \times 200$  lattice simulation of PC/PS/Chol 70:20:10 in the presence of annexin. (top) Lipid and (bottom) protein, with a protein–protein interaction of  $\epsilon_A = -0.68$  kcal/mol. Lipid: PS=black, PC=gray. Protein: black hexagons on lipid matrix (gray). ( $2 \times 10^4$  equilibration and  $2 \times 10^6$  acquisition cycles.)

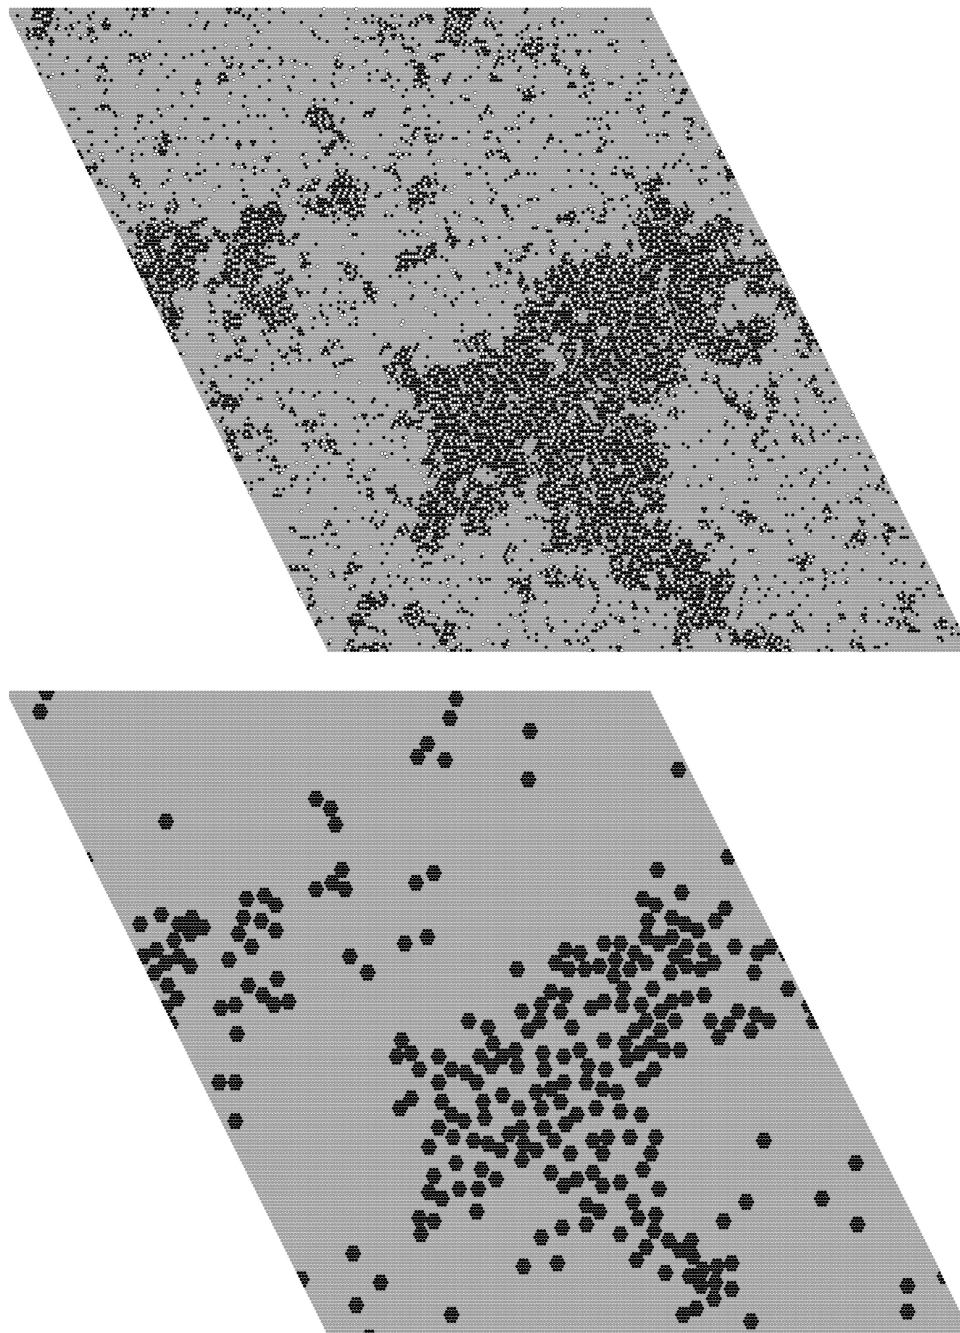

Figure S2 Snapshot of a  $200 \times 200$  lattice simulation of PC/PS/Chol 70:20:10 in the presence of annexin. (top) Lipid and (bottom) protein, without protein–protein interactions ( $\epsilon_A = 0$ ). Lipid: PS=black, PC=gray. Protein: black hexagons on lipid matrix (gray). ( $2 \times 10^4$  equilibration and  $2 \times 10^6$  acquisition cycles.)

### Effect of the Cholesterol–PS interaction on protein domain sizes

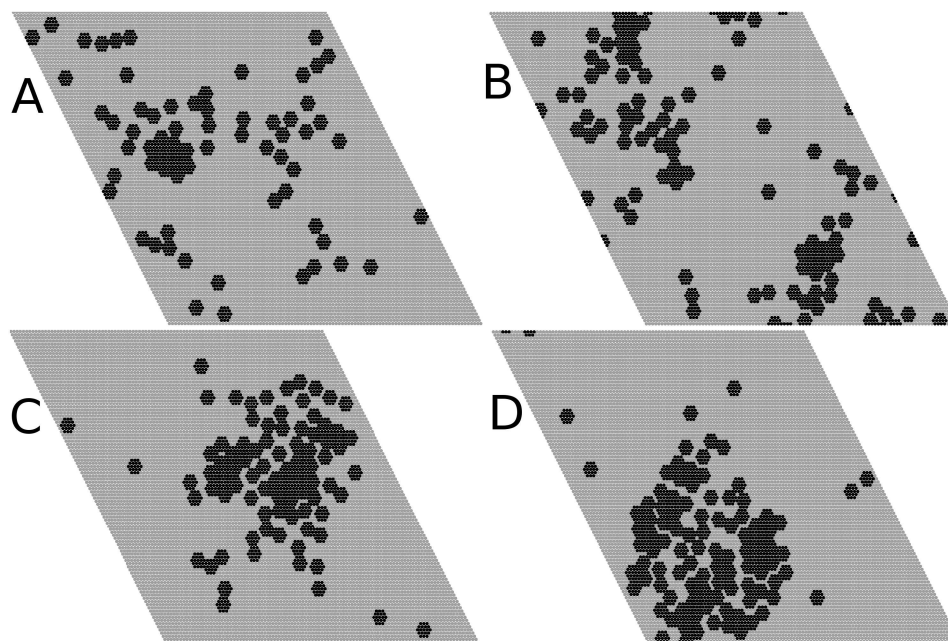

Figure S3 Effect of varying the PS-Chol interaction ( $\omega_{PS-Chol}$ ) on protein domain size in PC/PS/Chol 70:20:10, in the presence of 100  $\mu\text{M}$  annexin a5 (1000 proteins in the system). The four panels represent the same conditions as those in Fig. 6. (A)  $\omega_{PS-Chol} = -250$  cal/mol, (B)  $-300$  cal/mol, (C)  $-350$  cal/mol, and (D)  $-400$  cal/mol. Other parameters are the same as in Fig. 4. The proteins are the black hexagons on the lipid matrix (gray).
